# Supplementary material for: Association between preoperative concurrent fibular pseudarthrosis and risk of postoperative ankle valgus in patients with congenital pseudarthrosis of the tibia
Source: HighWire-hosted journal article supplement (doi:10.1136/bmjpo-2022-001763), 2023-02-01
Supplement: bmjpo-2022-001763supp001_data_supplement.pdf [file bmjpo-2022-001763supp001_data_supplement.pdf]

**Supplementary Table S1** Relationships between NF-1, CPT location, Fibula cystic change, and LLD and ankle valgus in different models.

|                      | Unadjusted model |           |                 | Minimally adjusted model |           |                 | Fully adjusted model |           |                 |
|----------------------|------------------|-----------|-----------------|--------------------------|-----------|-----------------|----------------------|-----------|-----------------|
|                      | OR               | (95% CI), | <i>p</i> -value | OR                       | (95% CI), | <i>p</i> -value | OR                   | (95% CI), | <i>p</i> -value |
| NF-1                 |                  |           |                 |                          |           |                 |                      |           |                 |
| No                   | Reference        |           |                 | Reference                |           |                 | Reference            |           |                 |
| Yes                  | 1.5 (0.9, 2.5)   | 0.096     |                 | 1.5 (0.9, 2.5)           | 0.114     |                 | 1.9 (1.1, 3.3)       | 0.021     |                 |
| CPT location         |                  |           |                 |                          |           |                 |                      |           |                 |
| Proximal 2/3         | Reference        |           |                 | Reference                |           |                 | Reference            |           |                 |
| Distal 1/3           | 1.6 (1.0, 2.7)   | 0.063     |                 | 1.7 (1.0, 2.8)           | 0.054     |                 | 1.4 (0.8, 2.5)       | 0.214     |                 |
| Fibula cystic change |                  |           |                 |                          |           |                 |                      |           |                 |
| No                   | Reference        |           |                 | Reference                |           |                 | Reference            |           |                 |
| Yes                  | 0.3 (0.1, 0.9)   | 0.033     |                 | 0.3 (0.1, 0.9)           | 0.036     |                 | 0.6 (0.2, 1.8)       | 0.349     |                 |
| LLD (cm)             |                  |           |                 |                          |           |                 |                      |           |                 |
| <2                   | Reference        |           |                 | Reference                |           |                 | Reference            |           |                 |
| ≥2                   | 2.1 (1.3, 3.4)   | 0.002     |                 | 2.1 (1.3, 3.4)           | 0.001     |                 | 1.6 (1.0, 2.8)       | 0.060     |                 |

Unadjusted model adjust for: None.

Minimally adjusted model adjust for: Gender; BMI; Fracture age; Surgery age.

Fully adjusted model adjust for: Gender; BMI; Fracture age; Age of patients undergoing surgery;

Surgery method; NF-1; LLD; CPT location; Fibula cystic change; Concurrent fibular pseudoarthrosis.

In each case, the model is not adjusted for the variable itself.
